# Supplementary material for: Genotype–phenotype correlation in PRKN-associated Parkinson’s disease
Source: Springer Nature journal article supplement (doi:10.1038/s41531-024-00677-3), 2024-03-29
Supplement: MOESM1 [file 41531_2024_677_MOESM1_ESM.pdf]

**Supplementary figure 1: Histogram of age at onset of *PRKN*-PD in the cohort.**

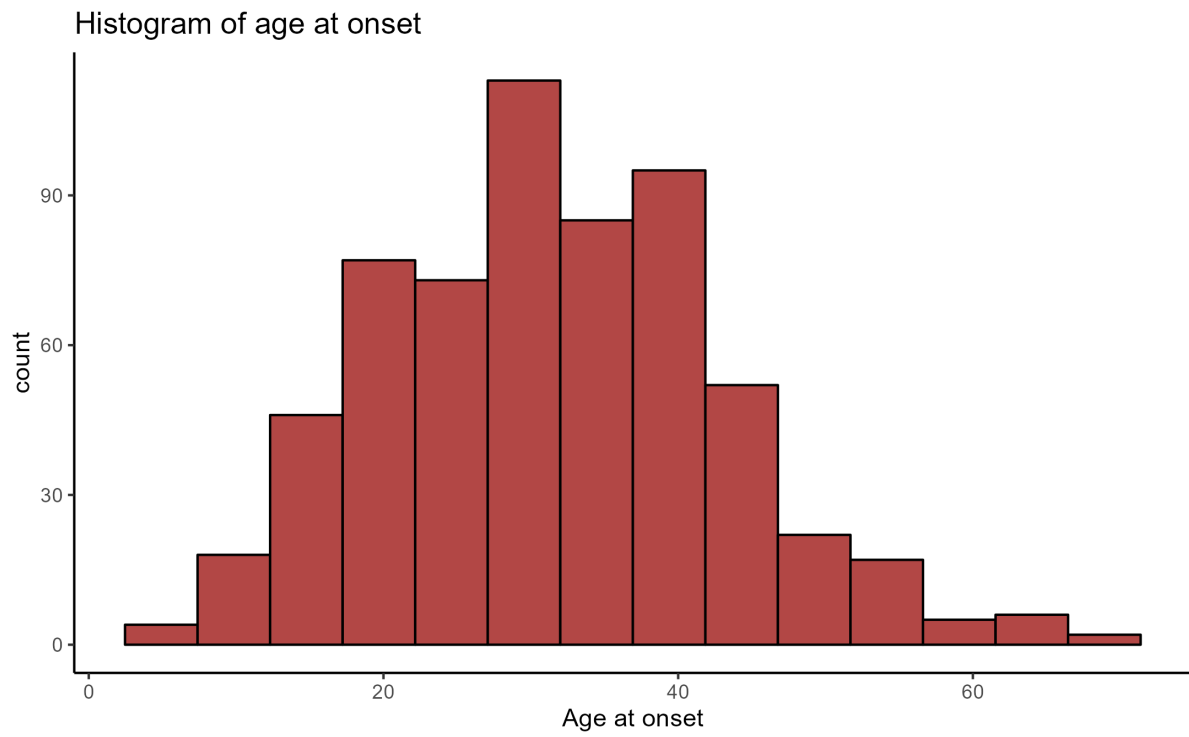

**Supplementary table 1: Demographic and clinical characteristics of the NGC, MJFF and GPiP centres.**

|                                                                     | <b>NGC<br/>(a)</b>                  | <b>MJFF<br/>(b)</b>               | <b>GPiP centres<br/>(c)</b>         | <b>P value<sup>‡</sup></b> |
|---------------------------------------------------------------------|-------------------------------------|-----------------------------------|-------------------------------------|----------------------------|
| <b>Number of patients</b>                                           | 227 (35.1%)                         | 253 (39.1%)                       | 167 (25.8%)                         |                            |
| <b>Female : Male</b>                                                | 110 : 104<br>( <i>n</i> =214)       | 124 : 129<br>( <i>n</i> =253)     | 74 : 91<br>( <i>n</i> =165)         | 0.4                        |
| <b>Mean age at onset<br/>(± SD)</b>                                 | 30.7 ± 10.7<br>( <i>n</i> =205)     | 32.4 ± 11.2<br>( <i>n</i> =245)   | 30.9 ± 12.3<br>( <i>n</i> =165)     | 0.23                       |
| <b>Mean disease duration<br/>(± SD)</b>                             | 16.0 ± 11.1 c<br>( <i>n</i> =144)   | 18.4 ± 11.7<br>( <i>n</i> =219)   | 20.2 ± 14.6 a<br>( <i>n</i> =140)   | 0.016*                     |
| <b>Mean UPDRS part III (ON)<br/>(± SD)</b>                          | 17.4 ± 13.6 b<br>( <i>n</i> =124)   | 23.1 ± 17.2 a<br>( <i>n</i> =138) | 19.1 ± 12.9<br>( <i>n</i> =92)      | 0.008*                     |
| <b>Mean UPDRS part III (OFF)<br/>(± SD)</b>                         | 33.4 ± 17.2<br>( <i>n</i> =58)      | N/A                               | 36.0 ± 2.8<br>( <i>n</i> =2)        | 0.8                        |
| <b>Mean Hoehn and Yahr (ON) (± SD)</b>                              | 1.9 ± 1.0 b, c<br>( <i>n</i> =127)  | 2.2 ± 0.9 a<br>( <i>n</i> =149)   | 2.2 ± 0.9 a<br>( <i>n</i> =81)      | 0.003*                     |
| <b>Mean Hoehn and Yahr (OFF) (± SD)</b>                             | 2.9 ± 1.3 c<br>( <i>n</i> =41)      | N/A                               | 2.3 ± 1.1 a<br>( <i>n</i> =28)      | 0.03*                      |
| <b>Mean MMSE<br/>(± SD)</b>                                         | 28.6 ± 3.3<br>( <i>n</i> =106)      | 27.4 ± 4.9 c<br>( <i>n</i> =67)   | 28.9 ± 1.8 b<br>( <i>n</i> =80)     | 0.02*                      |
| <b>Mean LEDD (mg)<br/>(± SD)</b>                                    | 430.2 ± 317.8<br>c ( <i>n</i> =141) | N/A                               | 587.7 ± 574.2<br>a ( <i>n</i> =111) | 0.006*                     |
| <b>Presence of DBS</b>                                              | 10<br>( <i>n</i> =27)               | N/A                               | 13<br>( <i>n</i> =110)              | 0.004*                     |
| <b>Mean disease duration at time<br/>of DBS in years<br/>(± SD)</b> | 26.0 ± 8.7<br>( <i>n</i> = 9)       | N/A                               | 21.7 ± 11.1<br>( <i>n</i> = 11)     | 0.4                        |

Notes. Following letters indicate which groups significantly differ: a group differs from NGC cohort; b group differs from MJFF cohort; c group differs from GPiP centres.

‡ Chi-square test was used to compare the groups for categorical variables and One way ANOVA for numerical variables. Post hoc comparisons were performed using pairwise Chisquared tests with Benjamini Hochberg correction for categorical variables and Tukey HSD tests for numerical variables.

## Supplementary table 2: Pathogenic *PRKN* variants present in index cases in the cohort.

The number refers to the number of times the variant was encountered in index cases. (If the variant was present on both alleles, e.g., a homozygous exon 3 deletion, it has been accounted for twice in the number count).

CADD scores have been included for single nucleotide variants.

CADD scores are not applicable for structural and frameshift variants.

SpliceAI maximum delta scores have been included for intronic variants.

|    | <b>Variant</b>           | <b>Number</b> | <b>% of index cases</b> | <b>CADD scores</b> | <b>SpliceAI score</b> |
|----|--------------------------|---------------|-------------------------|--------------------|-----------------------|
| 1  | deletion of exon 3       | 145           | 12.3                    |                    |                       |
| 2  | R275W                    | 117           | 10.0                    | 26.1               |                       |
| 3  | deletion of exon 3,4     | 80            | 6.8                     |                    |                       |
| 4  | N52Mfs*29                | 79            | 6.7                     |                    |                       |
| 5  | deletion of exon 4       | 65            | 5.5                     |                    |                       |
| 6  | Q34Rfs*5                 | 50            | 4.3                     |                    |                       |
| 7  | deletion of exon 2       | 43            | 3.7                     |                    |                       |
| 8  | deletion of exon 5       | 41            | 3.5                     |                    |                       |
| 9  | duplication of exon 3    | 29            | 2.5                     |                    |                       |
| 10 | G430D                    | 26            | 2.2                     | 25.8               |                       |
| 11 | P113Tfs*51               | 25            | 2.1                     |                    |                       |
| 12 | deletion of exon 5,6     | 22            | 1.9                     |                    |                       |
| 13 | deletion of exon 7       | 20            | 1.7                     |                    |                       |
| 14 | deletion of exon 3,4,5,6 | 15            | 1.3                     |                    |                       |
| 15 | E395*                    | 14            | 1.2                     | 36                 |                       |
| 16 | C253Y                    | 13            | 1.1                     | 26.3               |                       |
| 17 | R42P                     | 13            | 1.1                     | 24.9               |                       |
| 18 | deletion of exon 2,3,4   | 13            | 1.1                     |                    |                       |
| 19 | deletion of exon 2,3     | 11            | 0.9                     |                    |                       |
| 20 | deletion of exon 8,9     | 11            | 0.9                     |                    |                       |

|    |                                 |    |     |      |                    |
|----|---------------------------------|----|-----|------|--------------------|
| 21 | deletion of exon 6              | 11 | 0.9 |      |                    |
| 22 | V324Afs*111                     | 10 | 0.9 |      |                    |
| 23 | K211N                           | 9  | 0.8 | 24.9 |                    |
| 24 | P437L                           | 9  | 0.8 | 28.1 |                    |
| 25 | deletion of exon 1              | 9  | 0.8 |      |                    |
| 26 | R402C                           | 8  | 0.7 | 25.1 |                    |
| 27 | T240M                           | 8  | 0.7 | 23.4 |                    |
| 28 | W74Cfs*8                        | 8  | 0.7 |      |                    |
| 29 | deletion of exon 3,4,5          | 8  | 0.7 |      |                    |
| 30 | deletion of exon 4,5            | 8  | 0.7 |      |                    |
| 31 | deletion of promotor and exon 1 | 7  | 0.6 |      |                    |
| 32 | C212Y                           | 6  | 0.5 | 26.9 |                    |
| 33 | C238W                           | 6  | 0.5 | 23.6 |                    |
| 34 | C289G                           | 6  | 0.5 | 27   |                    |
| 35 | C441R                           | 6  | 0.5 | 29.4 |                    |
| 36 | V56E                            | 6  | 0.5 | 27.4 |                    |
| 37 | c.1286-3C>G                     | 6  | 0.5 | 23   | Acceptor loss 0.87 |
| 38 | deletion of exon 6,7            | 6  | 0.5 |      |                    |
| 39 | deletion of exon 8              | 6  | 0.5 |      |                    |
| 40 | duplication of exon 4,5,6       | 6  | 0.5 |      |                    |
| 41 | duplication of exon 7           | 6  | 0.5 |      |                    |
| 42 | G284R                           | 5  | 0.4 | 25.3 |                    |
| 43 | R334C                           | 5  | 0.4 | 18.9 |                    |
| 44 | W445*                           | 5  | 0.4 | 44   |                    |
| 45 | deletion of exon 5,6,7          | 5  | 0.4 |      |                    |
| 46 | duplication of exon 11          | 5  | 0.4 |      |                    |
| 47 | duplication of exon 2,3,4       | 5  | 0.4 |      |                    |
| 48 | triplication of exon 2          | 5  | 0.4 |      |                    |
| 49 | E79*                            | 4  | 0.3 | 33   |                    |
| 50 | F362Lfs*73                      | 4  | 0.3 |      |                    |
| 51 | K27del                          | 4  | 0.3 |      |                    |
| 52 | M1?                             | 4  | 0.3 |      |                    |
| 53 | Q311*                           | 4  | 0.3 | 57   |                    |
| 54 | R33*                            | 4  | 0.3 | 45   |                    |
| 55 | C268R                           | 3  | 0.3 | 28.2 |                    |
| 56 | H303Y                           | 3  | 0.3 | 26.7 |                    |
| 57 | R234Q                           | 3  | 0.3 | 20.9 |                    |
| 58 | R256C                           | 3  | 0.3 | 32   |                    |
| 59 | T415N                           | 3  | 0.3 | 25.2 |                    |
| 60 | deletion of exon 11             | 3  | 0.3 |      |                    |

|    |                                 |   |     |      |                                          |
|----|---------------------------------|---|-----|------|------------------------------------------|
| 61 | deletion of exon 4,5,6,7        | 3 | 0.3 |      |                                          |
| 62 | duplication of exon 2           | 3 | 0.3 |      |                                          |
| 63 | duplication of exon 4           | 3 | 0.3 |      |                                          |
| 64 | duplication of exon 5           | 3 | 0.3 |      |                                          |
| 65 | duplication of exon 6           | 3 | 0.3 |      |                                          |
| 66 | duplication of exon 7,8         | 3 | 0.3 |      |                                          |
| 67 | S198Pfs*27                      | 2 | 0.2 |      |                                          |
| 68 | deletion of exon 4,5,6          | 2 | 0.2 |      |                                          |
| 69 | *466Yext*24                     | 2 | 0.2 |      |                                          |
| 70 | duplication of exon 9           | 2 | 0.2 |      |                                          |
| 71 | C201Mfs*5                       | 2 | 0.2 |      |                                          |
| 72 | C212Wfs*13                      | 2 | 0.2 |      |                                          |
| 73 | D243N                           | 2 | 0.2 | 23.4 |                                          |
| 74 | H257R                           | 2 | 0.2 | 25.8 |                                          |
| 75 | P133Qfs*44                      | 2 | 0.2 |      |                                          |
| 76 | P159L                           | 2 | 0.2 | 25.6 |                                          |
| 77 | Q178*                           | 2 | 0.2 | 47   |                                          |
| 78 | R275Q                           | 2 | 0.2 | 31   |                                          |
| 79 | c.1083+1delG                    | 2 | 0.2 | 32   | Donor<br>loss 1.00<br>Donor<br>gain 1.00 |
| 80 | c.535-2A>C                      | 2 | 0.2 | 32   | Acceptor<br>loss 0.71                    |
| 81 | c.7+1G>A                        | 2 | 0.2 | 33   | Donor<br>loss 0.96                       |
| 82 | deletion of exon 1,2            | 2 | 0.2 |      |                                          |
| 83 | deletion of exon 1,2,3          | 2 | 0.2 |      |                                          |
| 84 | deletion of exon<br>1,2,3,4,5,6 | 2 | 0.2 |      |                                          |
| 85 | deletion of exon 10,11,12       | 2 | 0.2 |      |                                          |
| 86 | deletion of exon 12             | 2 | 0.2 |      |                                          |
| 87 | deletion of exon 2,3,4,5        | 2 | 0.2 |      |                                          |
| 88 | deletion of exon<br>4,5,6,7,8,9 | 2 | 0.2 |      |                                          |
| 89 | deletion of exon 7,8,9          | 2 | 0.2 |      |                                          |
| 90 | duplication of exon 3,4,5       | 2 | 0.2 |      |                                          |
| 91 | duplication of exon<br>4,5,6,7  | 2 | 0.2 |      |                                          |
| 92 | duplication of exon 6,7         | 2 | 0.2 |      |                                          |
| 93 | A225Ffs*8                       | 1 | 0.1 |      |                                          |
| 94 | A46T                            | 1 | 0.1 | 25.4 |                                          |

|     |                             |   |     |       |                    |
|-----|-----------------------------|---|-----|-------|--------------------|
| 95  | C150*                       | 1 | 0.1 | 41    |                    |
| 96  | C166Hfs*18                  | 1 | 0.1 |       |                    |
| 97  | C166Y                       | 1 | 0.1 | 24.9  |                    |
| 98  | C212G                       | 1 | 0.1 | 28.3  |                    |
| 99  | C352R                       | 1 | 0.1 | 25.3  |                    |
| 100 | D130AH                      | 1 | 0.1 |       |                    |
| 101 | D53E                        | 1 | 0.1 | 22.9  |                    |
| 102 | D87Tfs*16                   | 1 | 0.1 |       |                    |
| 103 | E310D                       | 1 | 0.1 | 18.74 |                    |
| 104 | H433P                       | 1 | 0.1 | 28.2  |                    |
| 105 | I29Cfs*27                   | 1 | 0.1 |       |                    |
| 106 | N428Kfs*141                 | 1 | 0.1 |       |                    |
| 107 | N428S                       | 1 | 0.1 | 24.5  |                    |
| 108 | P132Tfs*9                   | 1 | 0.1 |       |                    |
| 109 | Q100*                       | 1 | 0.1 | 22    |                    |
| 110 | Q100H                       | 1 | 0.1 | 11.36 |                    |
| 111 | Q276Rfs*22                  | 1 | 0.1 |       |                    |
| 112 | Q376Sfs*59                  | 1 | 0.1 |       |                    |
| 113 | R33Q                        | 1 | 0.1 | 18.7  |                    |
| 114 | W453*                       | 1 | 0.1 | 44    |                    |
| 115 | c. 735-2A>G                 | 1 | 0.1 | 33    | Acceptor loss 1.0  |
| 116 | c.1084-1G>A                 | 1 | 0.1 | 25.7  | Acceptor loss 1.0  |
| 117 | c.1084-1G>C                 | 1 | 0.1 | 25.1  | Acceptor loss 0.99 |
| 118 | c.534+3A>G                  | 1 | 0.1 | 19    | Acceptor loss 0.48 |
| 119 | c.7+1G>T                    | 1 | 0.1 | 33    | Donor loss 0.96    |
| 120 | c.7+5G>T                    | 1 | 0.1 | 23    | Donor gain 0.53    |
| 121 | deletion of exon 10         | 1 | 0.1 |       |                    |
| 122 | deletion of exon 3,4,5,6,7  | 1 | 0.1 |       |                    |
| 123 | deletion of exon 5,6,7,8,9  | 1 | 0.1 |       |                    |
| 124 | deletion of exon 7,8        | 1 | 0.1 |       |                    |
| 125 | duplication of exon 1,2     | 1 | 0.1 |       |                    |
| 126 | duplication of exon 12      | 1 | 0.1 |       |                    |
| 127 | duplication of exon 2,3     | 1 | 0.1 |       |                    |
| 128 | duplication of exon 2,3,4,5 | 1 | 0.1 |       |                    |
| 129 | duplication of exon 2,3,6   | 1 | 0.1 |       |                    |

|     |                                    |   |     |  |  |
|-----|------------------------------------|---|-----|--|--|
| 130 | duplication of exon 3,4,5,6,7,8,9  | 1 | 0.1 |  |  |
| 131 | duplication of exon 5,6,7          | 1 | 0.1 |  |  |
| 132 | duplication of exon 7,8,9,10,11,12 | 1 | 0.1 |  |  |
| 133 | triplication of exon 3             | 1 | 0.1 |  |  |

**Supplementary table 3: Variants that have not previously been reported that were identified in this cohort.**

| <b>Variant</b> | <b>Source</b> | <b>2nd variant with it</b> | <b>ACMG classification</b> | <b>ClinVar</b>         | <b>Age at onset</b> | <b>Reason for inclusion</b>                                                                  |
|----------------|---------------|----------------------------|----------------------------|------------------------|---------------------|----------------------------------------------------------------------------------------------|
| Q100H          | GPiP          | deletion of exon 3,4       | Likely benign              | Uncertain significance | 50                  | Not present in gnomAD and confirmation from center that variant is responsible for phenotype |
| P159L          | GPiP          | homozygous                 | VUS                        |                        | 56                  | Rare variant with MAF of 0.00003 and confirmation from center that variant is responsible    |

|                                        |      |                                                               |                   |                        |               |                                                                  |
|----------------------------------------|------|---------------------------------------------------------------|-------------------|------------------------|---------------|------------------------------------------------------------------|
|                                        |      |                                                               |                   |                        |               | for phenotype                                                    |
| H303Y                                  | MJFF | 2 cases with R275W and another case with deletion of exon 5,6 | VUS               | Not in clinvar         | 53, 43 and 38 | Rare variant (MAF 0.000013) with known pathogenic second variant |
| R275Q                                  | MJFF | With R275W                                                    | Likely pathogenic | Uncertain significance | 46            | Likely pathogenic variant                                        |
| P133Qfs*44                             | MJFF | Homozygous                                                    | Likely pathogenic | Not in ClinVar         | 33            | Likely pathogenic variant                                        |
| c.534+3 A>G                            | MJFF | D53E                                                          | VUS               | Not in ClinVar         | 38            | Rare splice region variant (MAF 0.0000197)                       |
| C150*                                  | MJFF | Deletion of exon 2,3                                          | Likely pathogenic | Not in ClinVar         | 40            | Likely pathogenic variant                                        |
| C166Hfs*18                             | GPiP | G284R                                                         |                   | Not in ClinVar         | 28            | Variant associated with loss of function                         |
| C166Y                                  | GPiP | Deletion of exon 1,2,3                                        | Likely pathogenic | Not in ClinVar         | 17            | Likely pathogenic variant                                        |
| C352R                                  | GPiP | R275W                                                         | VUS               | Not in ClinVar         | 34            | Variant not present in gnomAD                                    |
| c.388_389insCAC (p.Asp130delinsAlaHis) | GPiP | Deletion of exon 3                                            |                   | Not in ClinVar         | 48            | Variant not present in gnomAD                                    |



|                               |      |                                 |                   |                |    |                                          |
|-------------------------------|------|---------------------------------|-------------------|----------------|----|------------------------------------------|
| D53E                          | MJFF | c.534+3A>G                      | VUS               | Not in ClinVar | 38 | Variant not present in gnomAD            |
| c.259del (p.Asp87 ThrfsTer16) | GPiP | Deletion of exon 4              | Likely pathogenic | Not in ClinVar | 47 | Variant not present in gnomAD            |
| H433P                         | NGC  | deletion of exon 3,4,5,6        | VUS               | Not in ClinVar | 41 | Variant not present in gnomAD            |
| I29Cfs*27                     | NGC  | c.7+1G>A                        |                   | Not in ClinVar | 24 | Variant associated with loss of function |
| N428S                         | MJFF | deletion of exon 3,4            | VUS               | Not in ClinVar | 44 | Variant not present in gnomAD            |
| P132Tfs*9                     | GPiP | P437L                           |                   | Not in ClinVar | 66 | Variant associated with loss of function |
| Q100*                         | GPiP | R275W                           | Likely pathogenic | Not in ClinVar | 19 | Likely pathogenic variant                |
| Q376Sfs*59                    | NGC  | deletion of exon 3,4            |                   | Not in ClinVar | 39 | Variant associated with loss of function |
| C212G                         | GPiP | Homozygous deletion of exon 5,6 | Likely pathogenic | Not in ClinVar | 38 | Likely pathogenic variant                |

(VUS = variant of uncertain significance)

**Supplementary table 4: Molecular features of *PRKN* variants identified in index cases.**

| <b>Feature</b>                                               | <b>N</b> | <b>Proportion</b> |
|--------------------------------------------------------------|----------|-------------------|
| <b>Zygoty</b>                                                |          |                   |
| Compound Heterozygous                                        | 319      | 54.8%             |
| Homozygous                                                   | 263      | 45.2%             |
|                                                              |          |                   |
| <b>Type of variant<br/>(Variant 1/ Variant 2/ Variant 3)</b> |          |                   |
| Structural/ Structural                                       | 228      | 39.2%             |
| Missense / Structural                                        | 103      | 17.7%             |
| Structural/ Frameshift                                       | 60       | 10.3%             |
| Missense/ Missense                                           | 56       | 9.6%              |
| Frameshift/ Frameshift                                       | 49       | 8.4%              |
| Missense/ Frameshift                                         | 36       | 6.2%              |
| Nonsense/ Nonsense                                           | 13       | 2.2%              |
| Nonsense/Structural                                          | 6        | 1.1%              |
| Missense/ Splice site                                        | 5        | 0.9 %             |
| Splice site/ Splice site                                     | 4        | 0.7%              |
| Missense/ Missense/ Missense                                 | 3        | 0.5%              |
| Nonsense/ Missense                                           | 3        | 0.5%              |
| Structural/ Structural/ Structural                           | 3        | 0.5%              |
| Indels/ Indels                                               | 2        | 0.3%              |
| Splice site/ Structural                                      | 2        | 0.3%              |
| Missense / Missense / Structural                             | 2        | 0.3%              |
| Frameshift/ Splice site                                      | 1        | 0.2%              |
| Missense / Frameshift / Structural                           | 1        | 0.2%              |
| Missense/ Missense/ Splice site                              | 1        | 0.2%              |
| Structural / Structural / Missense                           | 1        | 0.2%              |
| Structural/ Indels                                           | 1        | 0.2%              |
| Frameshift/ Nonsense                                         | 1        | 0.2%              |
|                                                              |          |                   |
| <b>Most frequent exonic location of variants*</b>            |          |                   |
| Exon 3/ Exon 3                                               | 61       | 10.5%             |
| Exon 2/ Exon 2                                               | 56       | 9.6%              |
| Exon 2/ Exon 3                                               | 28       | 4.8%              |
| Exon 7/ Exon 7                                               | 26       | 4.5 %             |
| Exon 3,4/ Exon 3,4                                           | 21       | 3.6%              |

|                                                                       |    |       |
|-----------------------------------------------------------------------|----|-------|
| Exon 4/ Exon 4                                                        | 18 | 3.1%  |
| Exon 11/ Exon 11                                                      | 15 | 2.6%  |
| Exon 5/ Exon 5                                                        | 15 | 2.6%  |
|                                                                       |    |       |
| <b>Most frequent protein domains involved in variants<sup>#</sup></b> |    |       |
| Ring 0/ Ring 0                                                        | 78 | 15.4% |
| Ubiquitin-like/ Ubiquitin-like                                        | 73 | 14.5% |
| Ring 0/ Ring 1                                                        | 45 | 8.9%  |
| Ubiquitin-like/ NA <sup>†</sup>                                       | 41 | 8.1%  |
| Ubiquitin-like/ Ring 0                                                | 35 | 6.9%  |
| Ring1/Ring1                                                           | 32 | 6.3%  |

\*There were 160 different combinations of exonic/ intronic (splice site variant) locations for the variants and therefore only the 8 most frequent locations have been listed.

# Similarly, there were 49 different combinations of protein domain locations for the variants and therefore only the most frequent locations have been listed. Of note 77 cases (13.2%) had 2 variants which couldn't be categorized into a specific protein domain.

† NA refers to cases where the second variant couldn't be categorized into a specific protein domain.

## Supplementary figure 2: Flow chart demonstrating the number of patients included for each section of the analysis.

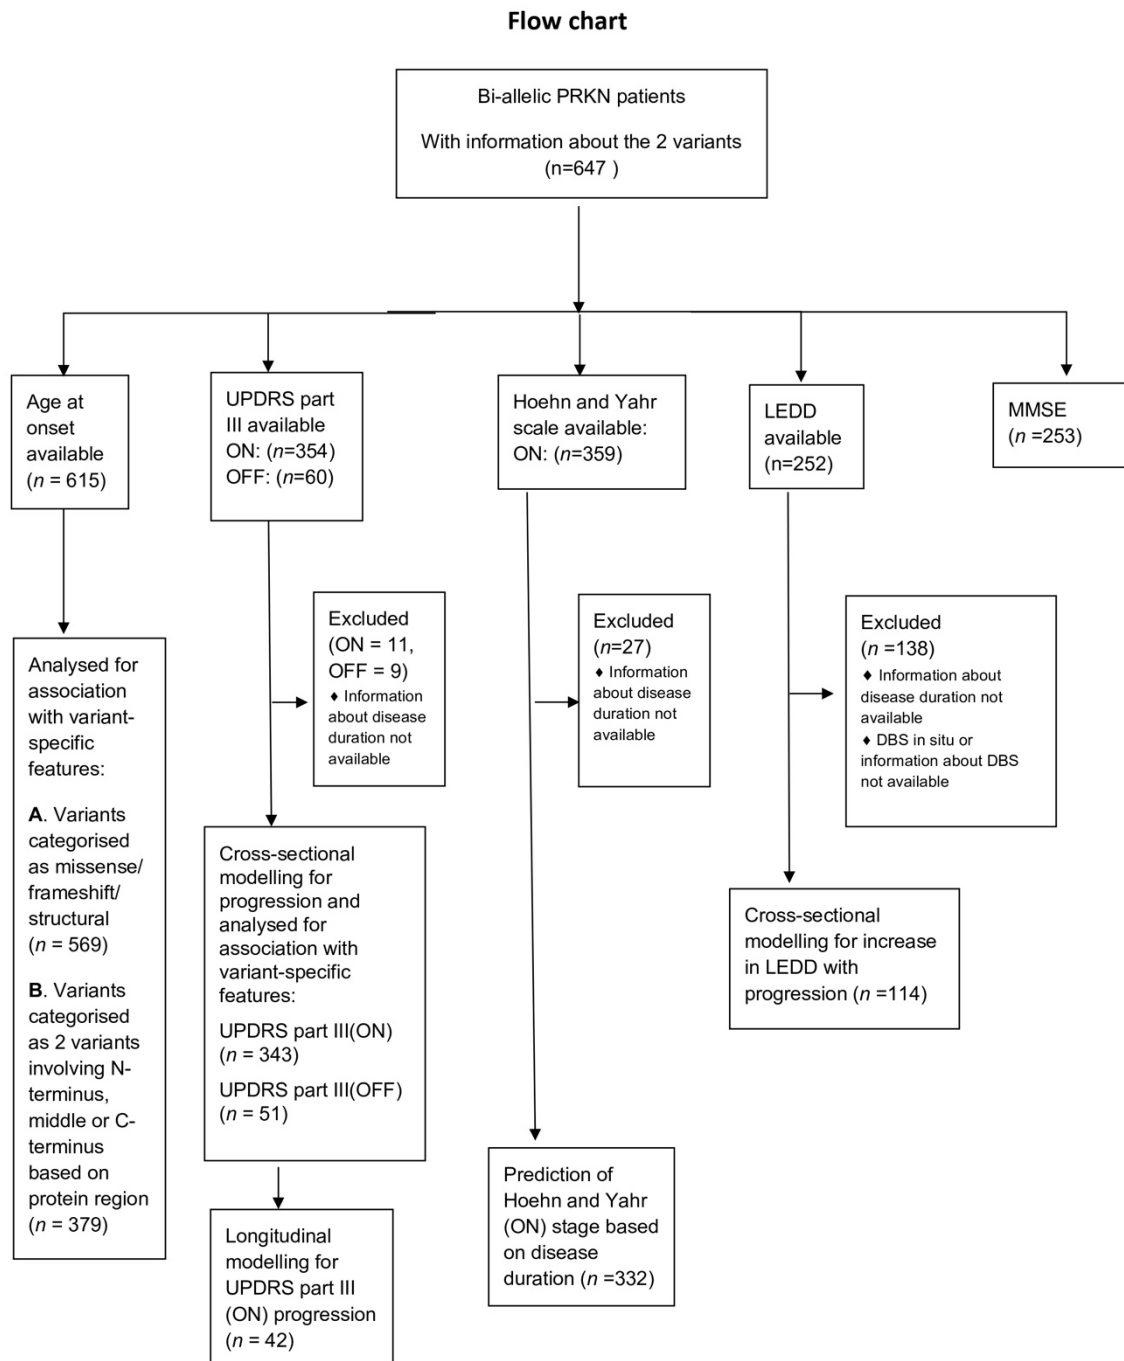

### Supplementary figure 3: Boxplot demonstrating the average age at onset of *PRKN*-PD based on the type of variant and the sex of the individual.

(f/f = frameshift/frameshift, f/m = frameshift/ missense, f/s = frameshift/ structural, m/m = missense/ missense, m/s = missense/ structural, s/s = structural/ structural).

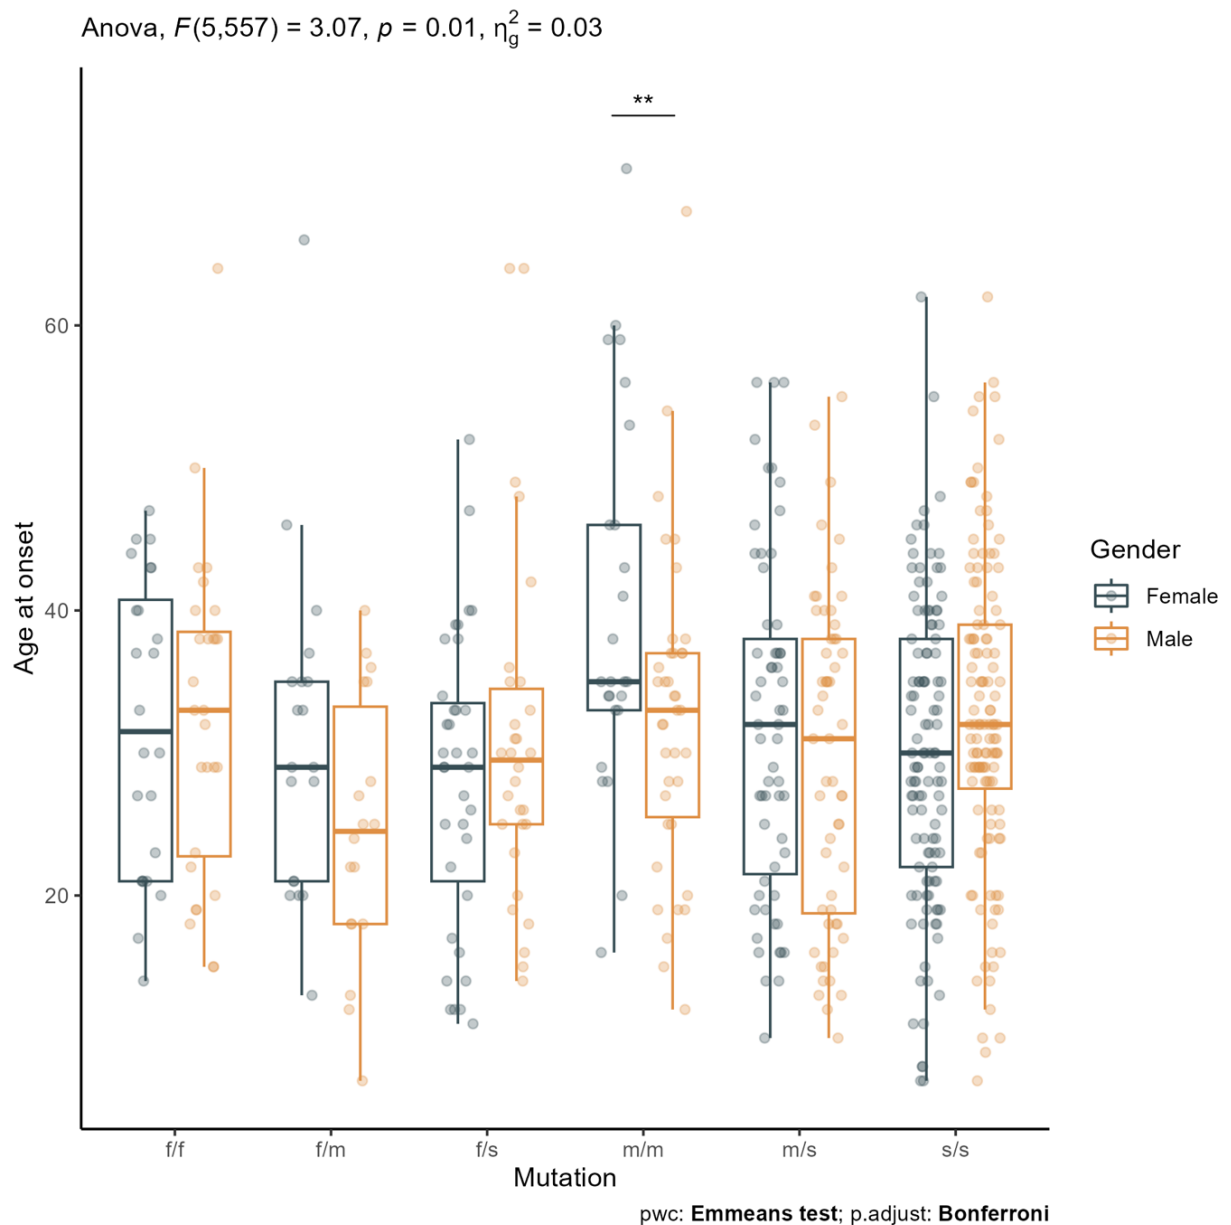

**Supplementary figure 4: Histogram demonstrating age at onset of *PRKN*-PD in those with homozygous exon 3 deletions and homozygous N52Mfs\*29 variants.**

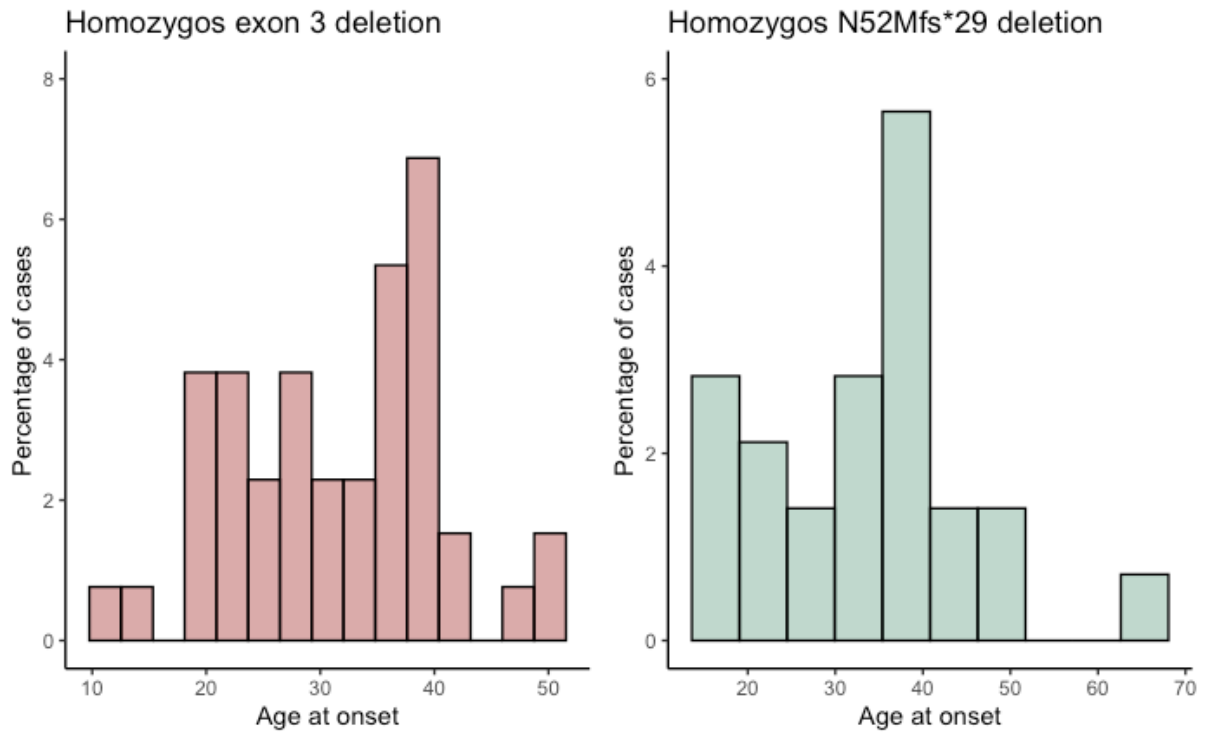

## Supplementary figure 5: Flow chart demonstrating the number of patients included for analysis on detailed phenotypic features.

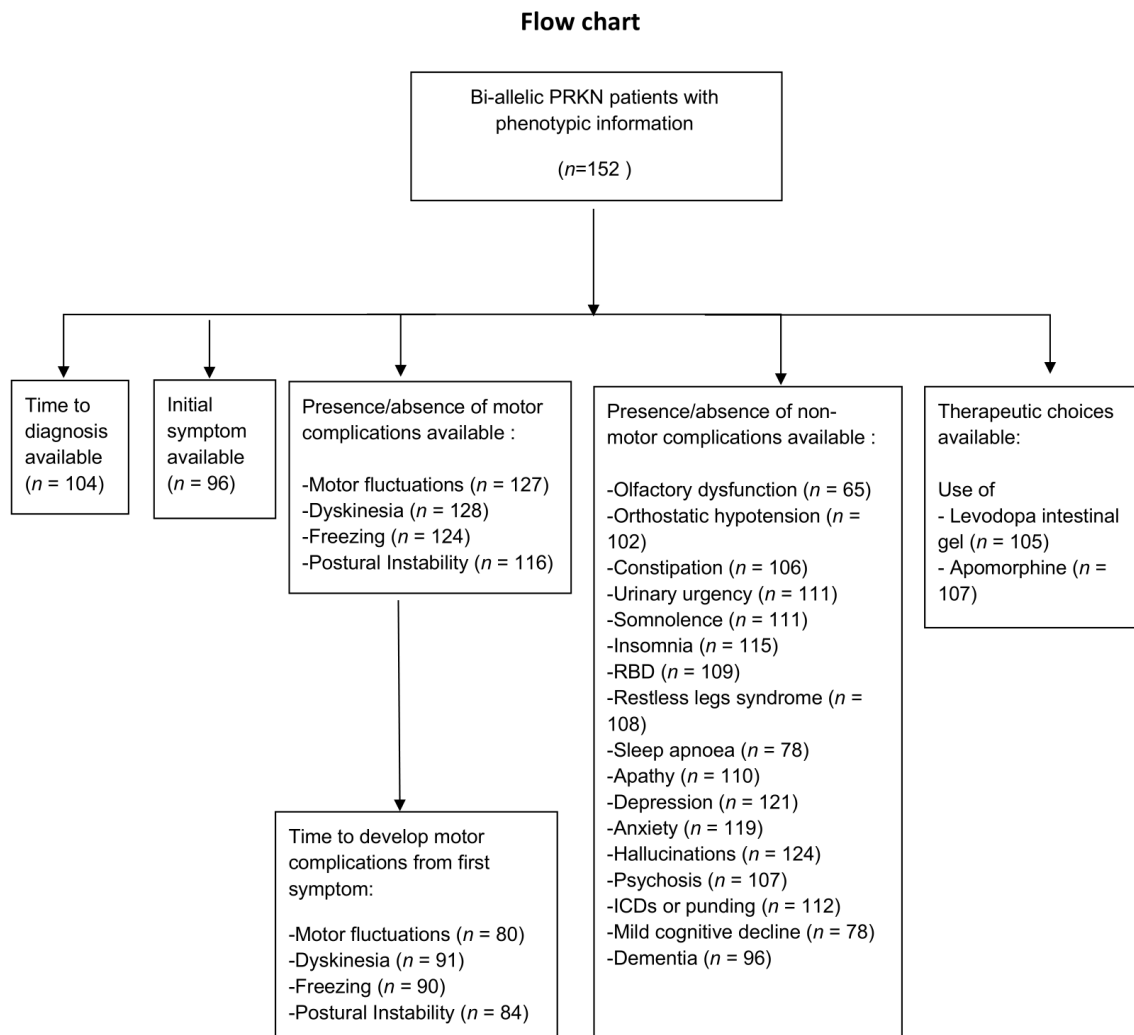

### Supplementary figure 6: Linear regression model of UPDRS III (ON) progression adjusted for sex.

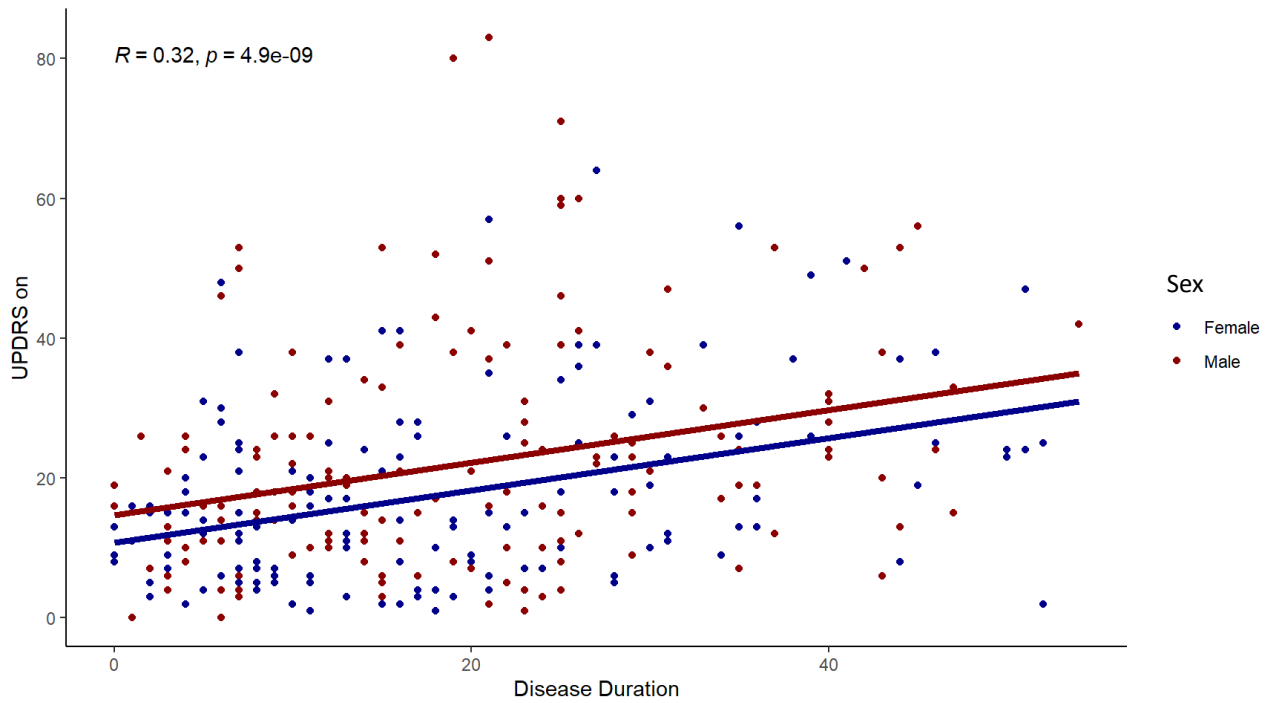



**Supplementary table 5: Predicted probability of belonging to each Hoehn and Yahr stage based on disease duration.**

| <b>Hoehn and Yahr Stage 0-1</b> |           |              |  |
|---------------------------------|-----------|--------------|--|
| Disease duration                | Predicted | 95% CI       |  |
| -----                           |           |              |  |
| 0                               | 0.52      | [0.42, 0.60] |  |
| 10                              | 0.33      | [0.27, 0.39] |  |
| 20                              | 0.19      | [0.15, 0.23] |  |
| 35                              | 0.07      | [0.04, 0.10] |  |
| 55                              | 0.02      | [0.01, 0.03] |  |

  

| <b>Hoehn and Yahr Stage 2</b> |           |              |  |
|-------------------------------|-----------|--------------|--|
| Disease duration              | Predicted | 95% CI       |  |
| -----                         |           |              |  |
| 0                             | 0.40      | [0.33, 0.47] |  |
| 10                            | 0.50      | [0.44, 0.56] |  |
| 20                            | 0.51      | [0.45, 0.57] |  |
| 35                            | 0.35      | [0.28, 0.42] |  |
| 55                            | 0.12      | [0.06, 0.20] |  |

  

| <b>Hoehn and Yahr Stage 3</b> |           |              |  |
|-------------------------------|-----------|--------------|--|
| Disease duration              | Predicted | 95% CI       |  |
| -----                         |           |              |  |
| 0                             | 0.07      | [0.05, 0.11] |  |
| 10                            | 0.14      | [0.11, 0.19] |  |
| 20                            | 0.25      | [0.20, 0.30] |  |
| 35                            | 0.42      | [0.34, 0.50] |  |
| 55                            | 0.40      | [0.29, 0.52] |  |

  

| <b>Hoehn and Yahr Stage 4</b> |           |              |  |
|-------------------------------|-----------|--------------|--|
| Disease duration              | Predicted | 95% CI       |  |
| -----                         |           |              |  |
| 0                             | 0.01      | [0.01, 0.02] |  |
| 10                            | 0.03      | [0.02, 0.05] |  |
| 20                            | 0.06      | [0.04, 0.09] |  |
| 35                            | 0.16      | [0.11, 0.23] |  |
| 55                            | 0.46      | [0.31, 0.63] |  |

### Supplementary figure 7: Logistic regression model of probability of belonging to a Hoehn and Yahr stage based on disease duration.

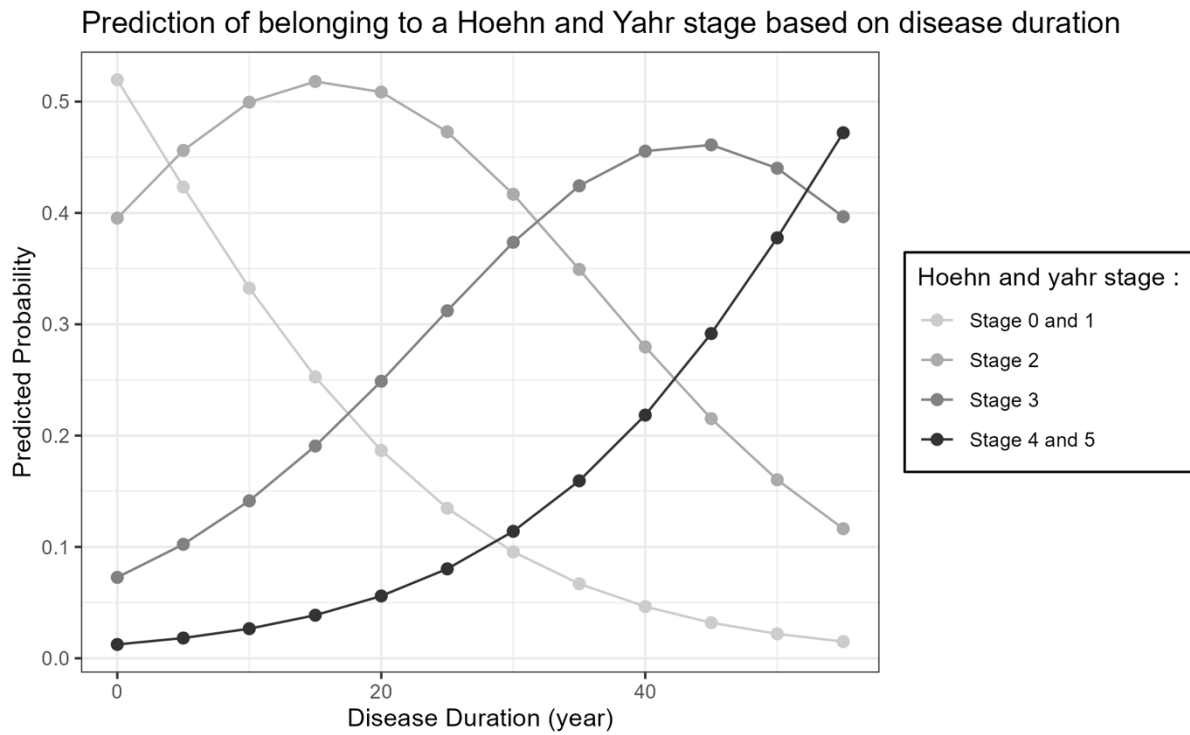

**Supplementary figure 8: Boxplot comparing the age at onset of first symptom in the *PRKN*-PD cohort compared to the early-onset PD cohort**

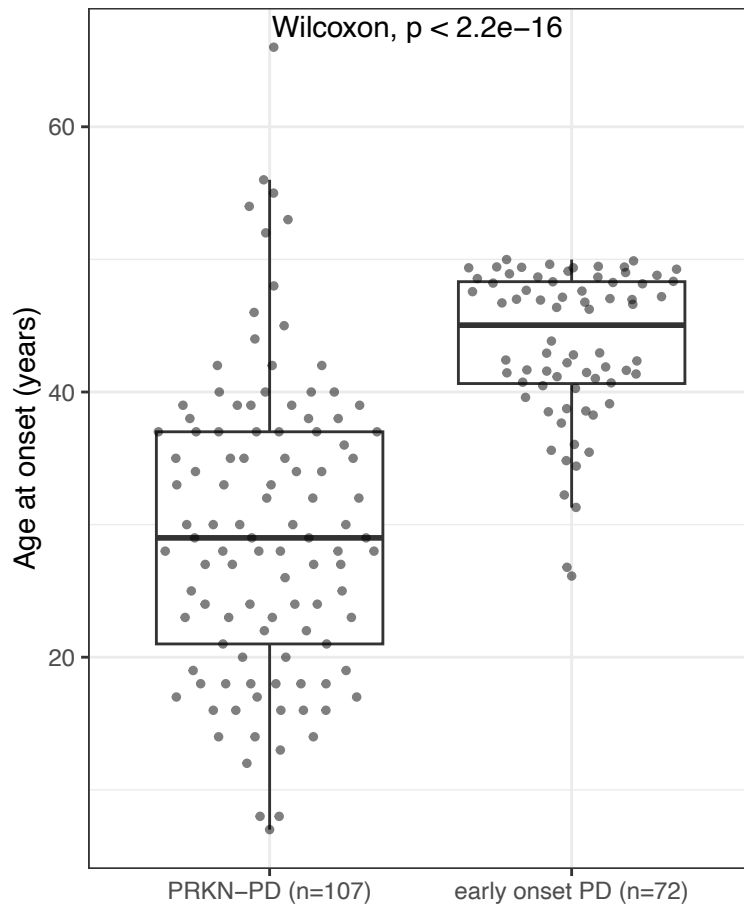

**Supplementary table 6: List of centres that collaborated to the Genotype-Phenotype correlation in *PRKN*-PD (GPiP) study.**

| <b>GPiP centres</b>                                                                                                                                                 |
|---------------------------------------------------------------------------------------------------------------------------------------------------------------------|
| 1. Fondazione IRCCS Ca' Granda Ospedale Maggiore Policlinico, Milan, Italy                                                                                          |
| 2. Institute of Neurogenetics, University of Lübeck, Lübeck, Germany                                                                                                |
| 3. UCL Queen Square Institute of Neurology, University College London, London, United Kingdom                                                                       |
| 4. Department of Neurology, Hospital Universitari Mutua de Terrassa, and Fundació per a la Recerca Biomèdica i Social Mútua de Terrassa, Terrassa, Barcelona, Spain |
| 5. National Institute of Health, Bethesda, United States                                                                                                            |
| 6. Hertie Institute for Clinical Brain Research, University of Tuebingen, Germany                                                                                   |
| 7. Department of Neurology, MedUniVienna, Austria                                                                                                                   |
| 8. The Dublin Neurological Institute at the Mater Misericordiae University Hospital, Dublin and University College Dublin, Ireland                                  |
| 9. Norwegian University of Science and Technology, Trondheim, Norway                                                                                                |
| 10. The Neuro (Montreal Neurological Institute-Hospital), McGill University, Montreal, Quebec, Canada                                                               |
| 11. Department of Neurology, University Hospitals Leuven, Belgium                                                                                                   |
| 12. University Clinical Center of Serbia, Neurology Clinic, Belgrade, Serbia                                                                                        |

# Appendix 1

## **The French clinicians' network for Parkinson's disease genetics (the PDG group) members:**

Yves Agid (site investigator, Department for the Central Nervous System, Paris), Mathieu Anheim (site investigator, Department of Neurology, Strasbourg), Michel Borg (site investigator, Department of Neurology, Nice), Alexis Brice (site investigator, Department of Genetics and Cytogenetics, Paris), Emmanuel Broussolle (site investigator, Pôle des Spécialités Neurologiques, Lyon), Jean-Christophe Corvol (site investigator, Center for Clinical Investigations, Paris), Philippe Damier (site investigator, Department of Neurology, Nantes), Luc Defebvre (site investigator, Service de Neurologie et Pathologie du Mouvement, Clinique Neurologique, Hôpital Roger Salengro, Lille), Alexandra Dürr (site investigator, Department of Genetics and Cytogenetics, Paris), Franck Durif (site investigator, Department of Neurology A, Clermont-Ferrand), Jean Luc Houetto (site investigator, service de neurologie, CHU de Poitiers, Poitiers), Paul Krack (site investigator, Pôle Psychiatrie et Neurologie, Grenoble), Stephan Klebe (site investigator, Centre for Clinical Investigations, Paris), Suzanne Lesage (site investigator, ICM INSERM U1127, Paris), Ebba Lohmann (site investigator, Department of Genetics and Cytogenetics, Paris), Maria Martinez (site investigator, INSERM Unit 563, Toulouse), Graziella Mangone (site investigator, Centre for Clinical Investigations, Paris), Pierre Pollak (site investigator, Pôle Psychiatrie et Neurologie, Grenoble), Olivier Rascol (site investigator, Clinical Investigation Centre, Toulouse), François Tison (site investigator, Pôle des Neurosciences, Cliniques de Neurologie, Bordeaux), Christine Tranchant (site investigator, Department of Neurology, Strasbourg), Marc Vérin (site investigator, Department of Neurology, Rennes), François Viallet (site investigator, Department of Neurology, Aix-en-Provence), and Marie Vidailhet (site investigator, Department of Neurology, Paris).
